# Supplementary material
Source: publisher figshare collection journal article supplement (https://rs.figshare.com/ndownloader/files/14561087)
Supplement: Supplementary file 1 [file 14561087]

## Sheet: Sample sizes
	2003	2005	2007	2009
18	121	118	40	30
19	113	104	40	32
20	37	38	22	36
21	37	46	36	36
22	38	45	36	37
23	31	46	37	42
24	43	46	36	35
25	34	41	36	37
26	31	44	31	38
27	23	40	25	40
28	43	38	30	45
29	32	48	44	35
30	33	46	37	46
31	34	36	38	50
32	28	29	49	38
33	39	36	38	35
34	42	39	37	34
35	28	41	32	34
36	29	34	45	48
37	34	26	42	35
38	31	33	56	44
39	23	19	40	59
40	26	51	41	47
41	42	31	33	44
42	31	33	43	44
43	38	34	40	53
44	29	35	49	55
45	30	47	50	53
46	35	40	45	47
47	30	33	44	48
48	28	22	33	46
49	26	30	42	47
50	27	36	43	41
51	35	38	46	40
52	37	25	46	45
53	25	26	36	44
54	23	33	34	38
55	24	24	38	32
56	26	18	38	39
57	18	21	27	25
58	14	25	45	30
59	23	26	32	34

## Sheet: G-, S-
	2003	2005	2007	2009
18	96.5214	87.1083	29.2324	14.0362
19	82.1555	63.4015	31.4049	23.3809
20	29.7843	27.3944	13.5011	18.6166
21	26.4976	24.1707	23.2239	24.8428
22	22.7057	27.2209	18.8159	17.9865
23	16.5711	29.7627	19.0286	17.9641
24	28.8465	21.4405	22.1061	18.871
25	22.3066	16.0251	20.7475	20.1941
26	19.5836	32.2795	14.6533	23.12
27	16.1858	22.5636	11.7631	24.7785
28	28.8286	24.8833	17.4898	23.9138
29	11.1247	26.799	20.6087	17.7209
30	19.7289	24.874	19.3152	27.4864
31	20.1834	22.2049	18.936	27.7273
32	16.6742	18.9082	22.7771	22.0051
33	18.2072	28.9881	21.7697	20.567
34	18.0248	10.5143	23.2861	14.8475
35	14.5923	19.0821	20.395	17.5886
36	18.4978	16.9552	28.3724	29.2756
37	16.1858	16.3758	23.0524	22.3101
38	17.1777	15.5067	32.316	28.5837
39	13.6546	8.81232	21.1631	30.2511
40	10.3252	33.1062	18.9247	30.1463
41	25.2767	19.9356	18.3025	25.4562
42	16.425	25.1733	28.055	26.4091
43	20.3409	22.6493	25.0067	32.0863
44	18.2039	23.7322	30.7155	29.6711
45	16.6094	31.8221	26.016	28.5389
46	20.6663	19.9772	24.3384	30.6101
47	15.8407	25.7668	20.8841	32.4025
48	16.1584	12.6943	21.6411	28.0422
49	17.286	19.5231	23.2494	28.819
50	22.7316	26.4589	21.531	23.7444
51	22.4266	25.6372	27.8725	18.1293
52	24.8757	15.7758	32.623	31.5231
53	15.7	15.9079	21.2828	21.9534
54	16.6162	27.8085	18.3586	28.873
55	16.9658	16.6827	25.7356	15.9843
56	17.9399	15.0824	24.8788	27.8773
57	14.8849	19.5034	20.5991	17.214
58	8.87301	19.5186	37.5206	22.3548
59	11.5186	17.9311	22.122	19.8307

## Sheet: G-, S+
	2003	2005	2007	2009
18	6.58189	9.41014	6.13084	12.3733
19	11.152	6.76441	3.15075	7.09402
20	4.50742	2.66048	4.30656	9.43821
21	2.71232	10.7963	3.3345	3.63437
22	3.48279	9.30959	7.0414	8.31983
23	7.75348	12.5344	10.6741	11.7685
24	7.41881	16.444	9.91831	12.7577
25	10.1373	15.2614	12.5164	6.66628
26	9.05219	6.30131	11.255	9.81391
27	1.10668	14.3503	11.8591	11.6434
28	11.643	9.99042	7.5807	18.3598
29	17.7483	12.8592	17.5306	13.5736
30	11.7877	18.5414	12.7628	15.696
31	13.3931	8.94642	14.7967	14.7885
32	10.449	8.69085	23.4185	14.0554
33	11.5717	6.35484	12.0491	10.7824
34	22.6259	18.8981	10.6715	16.3546
35	11.3328	18.4029	10.6539	14.3535
36	8.51574	15.3306	14.6736	16.0806
37	9.25086	8.93228	17.2576	12.6899
38	8.72128	15.1047	21.5327	13.9362
39	6.58809	10.1877	15.9775	23.6033
40	13.3314	15.8056	16.9996	15.98
41	16.0879	11.0644	14.6975	13.491
42	13.6956	4.40512	11.5486	11.2712
43	17.6591	9.00574	13.6373	16.9312
44	10.415	6.2818	14.6629	24.6088
45	6.50747	15.1779	17.1104	21.2408
46	13.9638	17.8991	17.5594	15.8035
47	11.5469	5.34044	20.5587	13.973
48	10.8804	6.79592	9.70112	15.0637
49	8.71399	10.4769	18.2575	18.181
50	3.55874	7.2725	19.844	16.9047
51	9.7715	11.9262	17.4366	18.1255
52	9.47668	6.12459	11.3251	8.91417
53	7.33036	9.73779	10.7682	21.5043
54	6.38383	5.19153	13.4964	9.12696
55	7.0342	7.07476	11.5301	15.3564
56	6.05266	2.58495	12.6141	8.11088
57	3.11506	0.771674	6.40086	5.64814
58	2.15319	3.64158	7.16007	7.64518
59	8.83368	8.06889	9.46324	12.7781

## Sheet: G+, S-
	2003	2005	2007	2009
18	10.0516	10.1434	2.28591	3.59055
19	12.3352	19.4769	1.87443	0
20	0.890014	5.50666	3.19494	0
21	1.68235	3.55871	3.13979	1.92966
22	9.97716	5.97687	1.73363	3.74911
23	1.5485	0	0	7.94566
24	4.11474	4.1392	2.05732	0
25	1.55611	5.57259	0	2.37217
26	2.14305	2.86048	0.451283	0
27	0.077369	0.87566	1.37781	0.808521
28	0.736765	0.198772	3.9196	0.507134
29	2.4062	2.55759	1.25039	1.72199
30	0.556027	0.79799	1.1645	2.27462
31	0.42344	1.29239	0	0.606366
32	0	0.71503	0.667274	1.06314
33	1.59633	0	2.45037	2.67221
34	0	4.25342	0.448456	2.01244
35	0.804464	0	0	0
36	1.4196	0	1.13041	0
37	2.54076	0	0.601596	0
38	2.74117	0.511843	0	0
39	1.05327	0	2.8594	2.01545
40	1.9576	0	0	0.348401
41	0	0	0	2.90431
42	0.476096	0.449549	0	0
43	0	0	0.691795	2.44975
44	0	0	2.55461	0
45	0	0	1.84054	1.48872
46	0	0	1.84867	0
47	0.938237	1.89276	0.53862	0.520481
48	0	0.618483	1.6578	1.61943
49	0	0	0.493069	0
50	0.709666	1.39201	0	0.350863
51	1.43211	0.436613	0.444924	0.405136
52	0.31919	2.58711	0	1.97191
53	1.54023	0.354274	2.67569	0
54	0	0	0	0
55	0	0.242578	0	0.659236
56	0	0.332635	0	3.0118
57	0	0.724917	0	1.64357
58	0	0.400265	0	0
59	0.389767	0	0	0.389627

## Sheet: G+, S+
	2003	2005	2007	2009
18	7.84513	11.3382	2.35085	0
19	7.35724	14.3572	3.56995	1.52507
20	1.81827	2.43844	0.997428	7.94516
21	6.10775	7.47429	6.30182	5.59322
22	1.83436	2.4926	8.40909	6.94452
23	5.12696	3.70288	7.29734	4.32179
24	2.61992	3.97632	1.91831	3.37131
25	0	4.14095	2.73607	7.76744
26	0.221197	2.55873	4.64039	5.06613
27	5.63013	2.21043	0	2.76952
28	1.79169	2.92749	1.00987	2.21928
29	0.720799	5.78418	4.61024	1.98345
30	0.927385	1.78659	3.75752	0.543001
31	0	3.5563	4.26735	6.87783
32	0.876849	0.685965	2.13706	0.876297
33	7.62476	0.657018	1.73089	0.978397
34	1.34929	5.33419	2.59393	0.785524
35	1.27042	3.51497	0.951046	2.05782
36	0.566825	1.71424	0.82363	2.64386
37	6.02259	0.69193	1.08847	0
38	2.35989	1.87677	2.15133	1.48008
39	1.70406	0	0	3.1302
40	0.385833	2.08818	5.07568	0.525281
41	0.635375	0	0	2.14843
42	0.403253	2.97202	3.39637	6.31964
43	0	2.34492	0.664212	1.5328
44	0.381126	4.98601	1.06708	0.720018
45	6.88315	0	5.0331	1.73154
46	0.369829	2.1237	1.25359	0.586406
47	1.67414	0	2.01849	1.10399
48	0.961187	1.89125	0	1.27465
49	0	0	0	0
50	0	0.876573	1.62506	0
51	1.36976	0	0.245975	3.34002
52	2.32843	0.512533	2.05195	2.59078
53	0.429418	0	1.27332	0.542261
54	0	0	2.145	0
55	0	0	0.734371	0
56	2.00749	0	0.507075	0
57	0	0	0	0.494254
58	2.9738	1.43951	0.319318	0
59	2.25791	0	0.414727	1.00155
